# Supplementary material for: A GBI@PPyNWs-based prototype of reusable fluorescence sensor for the detection of Fe3+ in aqueous solution
Source: Royal Society of Chemistry journal article supplement (doi:10.1039/c2ay25576f), 2012-01-01
Supplement: c2ay25576f.pdf [file c2ay25576f.pdf]

# Electronic Supporting Information

## A GBI@PPyNWs-based Prototype of Reusable Fluorescence Sensor for the Detection of Fe<sup>3+</sup> in Aqueous Solution

Meiling Wang,<sup>a</sup> Guowen Meng,<sup>\*, a, c</sup> Qing Huang,<sup>\*, b</sup> Qiaoling Xu,<sup>a</sup> Guodong Liu<sup>a</sup>

<sup>a</sup> Key Laboratory of Materials Physics, and Anhui Key Laboratory of Nanomaterials and Nanostructures, Institute of Solid State Physics, Chinese Academy of Sciences, Hefei, 230031, China

<sup>b</sup> Key Laboratory of Ion Beam Bioengineering, Institute of Physical Science, Chinese Academy of Sciences, Hefei, 230031, China

<sup>c</sup> University of Science and Technology of China, Hefei, 230026, China.

\*To whom correspondence should be addressed. E-mail: [gwmeng@issp.ac.cn](mailto:gwmeng@issp.ac.cn), [huangq@ipp.ac.cn](mailto:huangq@ipp.ac.cn)

### The Supporting Information includes:

**Part S1** Fabrication of the GBI@PPyNWs

**Part S2** Optical spectra characterization of the GBI@PPyNWs

**Part S3** Calculation of the average coverage of GBI molecules on the GBI@PPyNWs

**Part S4** GBI coordination with Fe<sup>3+</sup>

**Part S5** Evaluation of the bonding constant  $K$  and the number of the bonding sites  $n$

**Figures S1 to S9**

### **Part S1 Fabrication of the GBI@PPyNWs**

Firstly, the AAO template was immersed in  $10^{-4}$  mol/L GBI/ethanol for 2 h, and rinsed with ethanol for several times to remove superfluous GBI molecules on its surface to achieve GBI modified AAO. The electrolyte for PPy electrodeposition contains 0.2 mol/L pyrrole and 0.5 mol/L NaCl in a 1:1(v/v) ethanol/deionized-water mixture, and was purged with  $N_2$  for 30 min prior to the electrodeposition. The electrodeposition was carried out under 1V in a common two-electrode electrochemical cell at ambient temperature.

### **Part S2 Optical spectra characterization of the GBI@PPyNWs**

Infrared (IR) spectra of the PPyNWs, GBI@PPyNWs, and the complex of GBI and  $Fe^{3+}$  were recorded on a Perkin-Elmer Fourier transform infrared (FTIR) spectrometer as KBr pellets. Fluorescence spectra measurements were carried out on a FL 4500 Fluorescence Spectrophotometer at ambient temperature. Excitation and emission slits were all set at 5 nm. Nitrates of various metal ions used in experiment were purchased from Aldrich Chemicals. The GBI@PPyNWs were dispersed in water and 1:1 (v/v) ethanol/water solutions to form 34  $\mu\text{g/ml}$  suspensions at pH 7.0. Varied concentrations of  $Fe^{3+}$  were titrated to the GBI@PPyNWs solution to form homogeneous medium for fluorescence characterization.

### **Part S3 Calculation of the average coverage of GBI molecules on the GBI@PPyNWs**

As the sensing of GBI to  $Fe^{3+}$  is based on the complexation, given that the bare GBI molecules in water and GBI molecules anchored on the surface of the PPyNWs in water have equal quantum efficiency and similar bonding equilibrium with  $Fe^{3+}$ , thus inflectional points on the titration curves correspond to the same ratio of  $Fe^{3+}$  to GBI, i.e.,

$$\frac{4 \times 10^{-5} \text{ mol/L} \cdot V}{10^{-5} \text{ mol/L} \cdot V} = \frac{7 \times 10^{-5} \text{ mol/L} \cdot V}{n \cdot V}$$

where  $V$  is the volume of the cuvette used in experiments, and  $n$  is the concentration of GBI in 34  $\mu\text{g/ml}$  GBI@PPyNWs solution. Thus 34  $\mu\text{g/ml}$  GBI@PPyNWs corresponds to  $1.75 \times 10^{-5}$  mol/L GBI, and the number of GBI molecules in per microgram of PPyNWs can be calculated to be  $3.1 \times 10^{14}$ .

### **Part S4 GBI coordination with $Fe^{3+}$**

To study the sensing mechanism of the GBI@PPyNWs to  $Fe^{3+}$ , we purposely titrated GBI aqueous solution to  $Fe^{3+}$  nitrate aqueous solution, and the result shows that there is an obvious color change from orange to dark red for  $Fe^{3+}$  nitrate solution (Fig. S7A). This indicates that coordination compounds between  $Fe^{3+}$  and GBI are formed. To further prove this, we measured the UV-vis absorption of GBI in E/W solution titrated with  $Fe^{3+}$ , and the IR spectra of GBI and its complexation with  $Fe^{3+}$ . For the fabrication of the coordination compounds of  $Fe^{3+}$  and GBI, 1 and 4 mmol of the  $Fe^{3+}$  nitrate and 1 mmol of the GBI ligand were each dissolved in 5 ml ethanol. Then the ligand solution was slowly titrated to the two  $Fe^{3+}$  nitrate ethanol solutions, thereby the  $Fe^{3+}$  salt solution become cloudy and dark red. After a while, a light yellow precipitate was isolated by filtration. As shown in Fig. S7B, the absorption peak of GBI at 294 nm was blue-shifted to 288 nm, and there appears an isosbestic point at 291 nm, confirming the complex formation. Furthermore, IR spectra of GBI and its complex with  $Fe^{3+}$  (Fig. S7C) proves the coordination of the nitrogen atoms of imidazole and guanidine with  $Fe^{3+}$ .<sup>[1]</sup> The IR spectra show that the band coming from  $\nu(NH\cdots N)$  of the guanidine group of GBI is shifted from  $3444\text{ cm}^{-1}$  to  $3343\text{ cm}^{-1}$  as a result of the complexation, and there appears a band at  $1384\text{ cm}^{-1}$ , which proves the presence of ionic nitrates in the coordination compound. Moreover, in the range of  $500\text{--}1800\text{ cm}^{-1}$  as shown in the inset of Fig. S7C, the  $\nu(C=N)$  of the imidazolic ring ( $1596\text{ cm}^{-1}$ ) is shifted to the higher energy compared to the free ligand, indicating the coordination of the imidazole nitrogen atom with  $Fe^{3+}$ ; while the shift of guanidine  $\nu(C=N)$  band from  $1541$  to  $1584\text{ cm}^{-1}$  proves the coordination of the guanidine nitrogen atom.<sup>[1]</sup>

#### Part S5 Evaluation of the bonding constant $K$ and the number of the bonding sites $n$

As the relationship between the fluorescence intensity and  $[Fe^{3+}]$  can be described by the following Eq.:

$$\text{Log}\left(\frac{I_0 - I}{I}\right) = \text{Log}K + n\text{Log}[Fe^{3+}]$$

where  $I_0$ ,  $I$ ,  $K$  and  $n$  are fluorescence intensity of GBI@PPyNWs in 1:1 (v/v) ethanol/water without and with  $Fe^{3+}$ , binding constant and the number of the bonding sites per GBI molecule respectively. Thus  $K$  and  $n$  can be calculated from the plot of  $\text{Log}(I_0 - I)/I$  versus  $\text{Log}[Fe^{3+}]$  shown in Fig. S8.

Figure S1 to S9

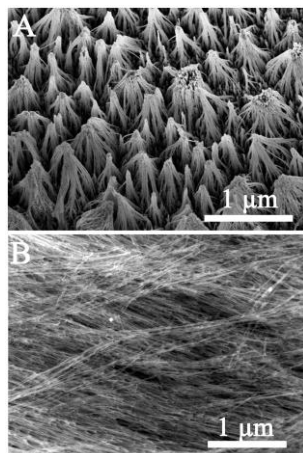

Fig. S1 SEM images of the GBI@PPyNWs.

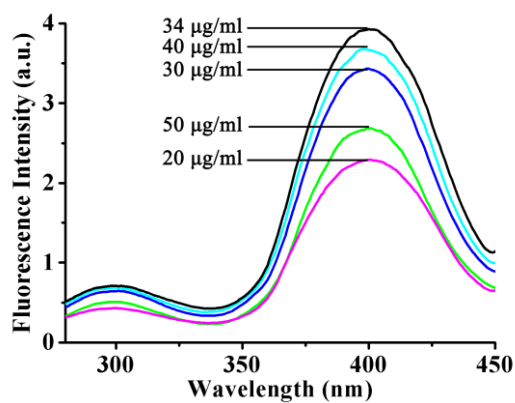

Fig. S2 Fluorescence spectra of different concentrations of GBI@PPyNWs.

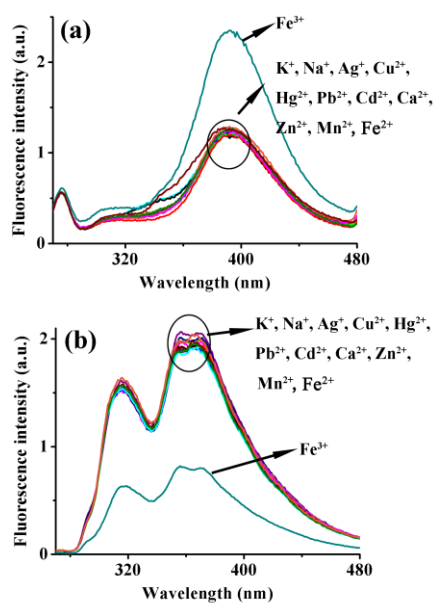

**Fig. S3** Fluorescence spectra of the GBI@PPyNWs in (A) water and (B) 1:1 (v/v) ethanol/ water solutions with  $10^{-5}$  mol/L  $M^{n+}$ . ( $\lambda_{\text{ex}}=250$  nm)

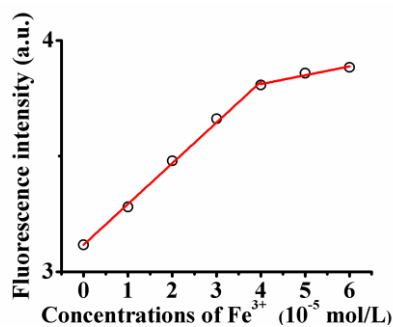

**Fig. S4** Titration curve of  $10^{-5}$  mol/L GBI in water solution with  $\text{Fe}^{3+}$ .

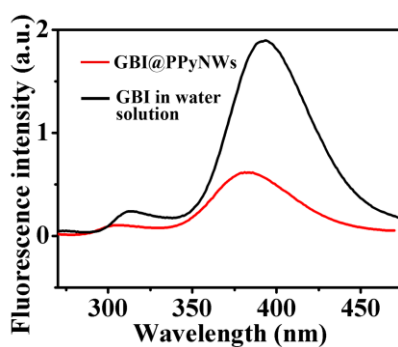

**Fig. S5** Fluorescence spectra of the 34  $\mu\text{g}/\text{mL}$  GBI@PPyNWs and the  $1.75 \times 10^{-5}$  M GBI in water solutions.

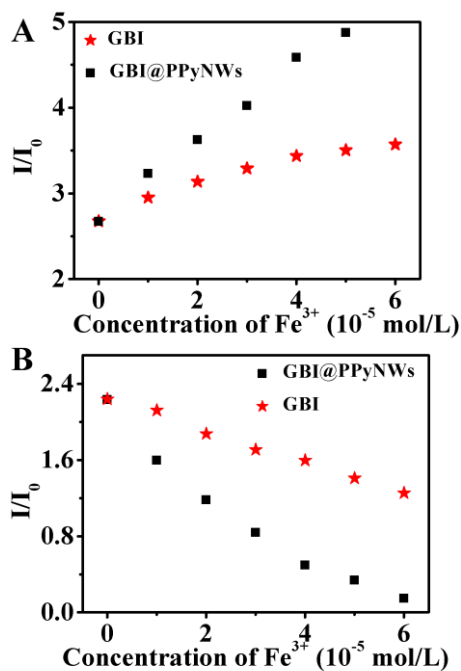

**Fig. S6** Comparison of the sensitivity of GBI@PPyNWs (34  $\mu\text{g/ml}$ ) and GBI ( $1.75 \times 10^{-5}$  mol/L) to  $\text{Fe}^{3+}$ : (A) in water and (B) in 1:1 ethanol/water respectively.  $\lambda_{\text{ex}}=250$  nm,  $\lambda_{\text{em}}=400$  and 370 nm for water and in 1:1 ethanol/water respectively.

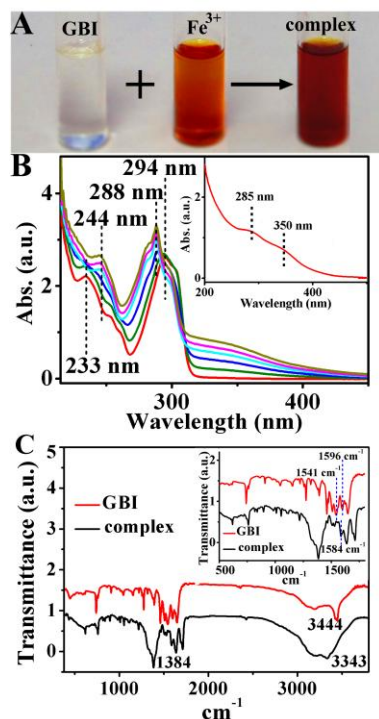

**Fig. S7** (A) Color changes before and after complexation. (B) UV-vis absorption spectra of 2 ml  $1.1 \times 10^{-4}$  M GBI in E/W solution in the presence of 0, 2, 4, 6, 8, 10 equiv.  $\text{Fe}^{3+}$ . Inset: UV-vis absorption spectrum of  $10^{-3}$  M  $\text{Fe}^{3+}$  in E/W. (C) IR spectra of GBI and the complex of  $\text{Fe}^{3+}$  with GBI.

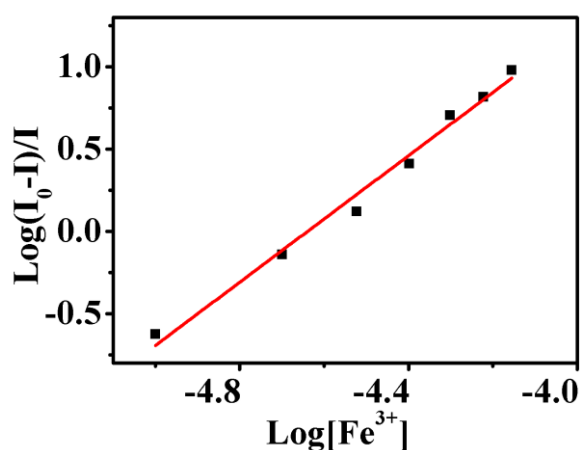

**Fig. S8** Bonding equilibrium of GBI and  $\text{Fe}^{3+}$ .

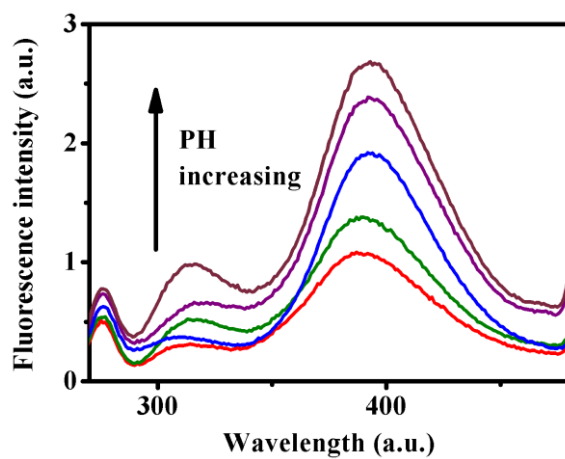

**Fig. S9** Fluorescence spectra of  $10^{-5}$  mol/L GBI solution with different pH. (pH=5, 6.5, 7, 9.5, 13 respectively)

#### Notes and References

- [1] M. Hasegawa, F. Renz, T. Hara, Y. Kikuchi, Y. Fukuda, J. Okubo, T. Hoshi, W. Linert. *Chem. Phys.*, 2002, **277**, 21–30.
